# Supplementary material for: miR-17 inhibition enhances the formation of kidney cancer spheres with stem cell/tumor initiating cell properties
Source: PubMed Central journal article supplement (PMC4467387; doi:10.18632/oncotarget.1901), 2014-04-16
Supplement: oncotarget-06-5567-s001.pdf [file oncotarget-06-5567-s001.pdf]

## miR-17 inhibition enhances the formation of kidney cancer spheres with stem cell/ tumor initiating cell properties

### Supplementary Material

**Supplementary Table 1: RCC spheres express CD44 and CD24.** Flow cytometry analysis indicates an accumulation of CD44/CD24 double positive cell population in RCC spheres compared to their parental cell lines.

|                            | CD24+/CD44-     | CD24-/CD44+   | CD24+/CD44+                 | CD24-/CD44-   |
|----------------------------|-----------------|---------------|-----------------------------|---------------|
| CAKI-1                     | 0.02<br>(0.01)  | 96.2<br>(2.5) | 0.55<br>(0.06)              | 1.5<br>(0.6)  |
| CAKI-1 SFDM spheres        | 0.02<br>(0.012) | 88.0<br>(2.7) | <b>9.83</b><br><b>(0.1)</b> | 0.8<br>(0.2)  |
| CAKI-1 anti-miR-17 spheres | 0.015<br>(0.01) | 86.7<br>(3.2) | <b>10.5</b><br><b>(1.2)</b> | 0.78<br>(0.4) |

|                          | CD24+/CD44-   | CD24-/CD44+   | CD24+/CD44+                 | CD24-/CD44-  |
|--------------------------|---------------|---------------|-----------------------------|--------------|
| ACHN                     | 0.15          | 96.8<br>(2.3) | 1.7<br>(0.6)                | 1.2<br>(1.1) |
| ACHN SFDM spheres        | 0.1<br>(0.1)  | 88.5<br>(2.1) | <b>9.98</b><br><b>(0.8)</b> | 1.4<br>(0.8) |
| ACHN anti-miR-17 spheres | 0.1<br>(0.15) | 81.2<br>(2.7) | <b>15.2</b><br><b>(3.6)</b> | 1.5<br>(1.2) |

**Supplementary Table 2: Signaling pathways predicted to be regulated by differentially expressed miRNAs in RCC spheres.**

Signaling pathways regulated by all miRNAs down-regulated in RCC spheres. Bold letters indicate the pathways that also regulate epithelial-to-mesenchymal transition.

| KEGG pathway                            | p-value  |
|-----------------------------------------|----------|
| <b>Regulation of actin cytoskeleton</b> | 1.16E-05 |
| Transcriptional misregulation in cancer | 1.16E-05 |
| Neurotrophin signaling pathway          | 3.34E-05 |
| <b>Jak-STAT signaling pathway</b>       | 0.000205 |
| MAPK signaling pathway                  | 0.000344 |
| <b>PI3K-Akt signaling pathway</b>       | 0.000344 |
| <b>Wnt signaling pathway</b>            | 0.000452 |
| Insulin signaling pathway               | 0.000555 |
| Endocytosis                             | 0.000697 |
| GnRH signaling pathway                  | 0.000802 |

|                                          |          |
|------------------------------------------|----------|
| <b>Focal adhesion</b>                    | 0.000802 |
| Adherens junction                        | 0.000858 |
| Vasopressin-regulated water reabsorption | 0.001345 |
| Pathways in cancer                       | 0.002096 |
| Amphetamine addiction                    | 0.003113 |
| <b>Chemokine signaling pathway</b>       | 0.003268 |
| Shigellosis                              | 0.003484 |
| Ubiquitin mediated proteolysis           | 0.00389  |
| Dorso-ventral axis formation             | 0.007361 |
| Prostate cancer                          | 0.009496 |

Signaling pathways predicted to be regulated by individual miRNAs that were down-regulated in RCC spheres.

#### **Hsa-miR-200c-3p**

| KEGG pathway                           | p-value  |
|----------------------------------------|----------|
| <b>ECM-receptor interaction</b>        | 2.26E-05 |
| <b>Notch signaling pathway</b>         | 0.00169  |
| Viral carcinogenesis                   | 0.008868 |
| Bacterial invasion of epithelial cells | 0.008986 |
| Prostate cancer                        | 0.008986 |
| Adherens junction                      | 0.014605 |
| Melanogenesis                          | 0.014605 |
| Pathways in cancer                     | 0.020888 |
| RNA transport                          | 0.039975 |
| <b>Wnt signaling pathway</b>           | 0.044952 |
| <b>Renal cell carcinoma</b>            | 0.044952 |

#### **Hsa-miR-204-5p**

| KEGG pathway                      | p-value  |
|-----------------------------------|----------|
| Adherens junction                 | 1.44E-07 |
| Colorectal cancer                 | 1.44E-07 |
| Endocytosis                       | 0.001279 |
| Pathways in cancer                | 0.001279 |
| Chronic myeloid leukemia          | 0.001279 |
| Pancreatic cancer                 | 0.001402 |
| <b>TGF-beta signaling pathway</b> | 0.002071 |
| Hepatitis B                       | 0.002071 |

|                                           |          |
|-------------------------------------------|----------|
| Apoptosis                                 | 0.002198 |
| Chagas disease (American trypanosomiasis) | 0.002497 |
| Osteoclast differentiation                | 0.004201 |
| Transcriptional misregulation in cancer   | 0.024475 |
| Toxoplasmosis                             | 0.028874 |
| MAPK signaling pathway                    | 0.035231 |
| Amyotrophic lateral sclerosis (ALS)       | 0.035231 |
| HTLV-I infection                          | 0.035231 |
| Cytokine-cytokine receptor interaction    | 0.047374 |

### **Hsa-miR-218-5p**

| KEGG pathway                                               | p-value  |
|------------------------------------------------------------|----------|
| ECM-receptor interaction                                   | 5.23E-09 |
| Small cell lung cancer                                     | 3.74E-05 |
| Epithelial cell signaling in Helicobacter pylori infection | 0.000846 |
| Chronic myeloid leukemia                                   | 0.00157  |
| Amoebiasis                                                 | 0.002457 |
| Acute myeloid leukemia                                     | 0.002971 |
| PI3K-Akt signaling pathway                                 | 0.003304 |
| Pathways in cancer                                         | 0.003304 |
| Transcriptional misregulation in cancer                    | 0.00921  |
| Prostate cancer                                            | 0.010115 |
| mTOR signaling pathway                                     | 0.018688 |
| Adipocytokine signaling pathway                            | 0.028456 |

### **Hsa-miR-17-5p**

| KEGG pathway                      | p-value  |
|-----------------------------------|----------|
| Pathways in cancer                | 1.26E-17 |
| Hepatitis B                       | 5.00E-12 |
| Colorectal cancer                 | 3.92E-11 |
| Bladder cancer                    | 1.38E-10 |
| Chronic myeloid leukemia          | 1.54E-09 |
| Pancreatic cancer                 | 3.47E-09 |
| <b>TGF-beta signaling pathway</b> | 2.72E-07 |
| Small cell lung cancer            | 2.47E-06 |
| <b>PI3K-Akt signaling pathway</b> | 7.58E-06 |
| Prostate cancer                   | 3.14E-05 |
| Melanoma                          | 4.75E-05 |

|                                               |          |
|-----------------------------------------------|----------|
| HTLV-I infection                              | 5.34E-05 |
| Glioma                                        | 7.94E-05 |
| p53 signaling pathway                         | 0.000216 |
| Acute myeloid leukemia                        | 0.000514 |
| <b>Focal adhesion</b>                         | 0.001084 |
| Endometrial cancer                            | 0.001743 |
| Cell cycle                                    | 0.002619 |
| Transcriptional misregulation in cancer       | 0.002791 |
| Non-small cell lung cancer                    | 0.004204 |
| Toxoplasmosis                                 | 0.008161 |
| Thyroid cancer                                | 0.015218 |
| Epstein-Barr virus infection                  | 0.020853 |
| ErbB signaling pathway                        | 0.025888 |
| <b>Cytokine-cytokine receptor interaction</b> | 0.025888 |
| <b>Wnt signaling pathway</b>                  | 0.037651 |
| <b>HIF-1 signaling pathway</b>                | 0.039581 |
| Adherens junction                             | 0.039581 |

### **Hsa-miR-18a-5p**

| KEGG pathway                               | p-value  |
|--------------------------------------------|----------|
| <b>TGF-beta signaling pathway</b>          | 0.001376 |
| Endocytosis                                | 0.004031 |
| Colorectal cancer                          | 0.007088 |
| Synthesis and degradation of ketone bodies | 0.029888 |
| p53 signaling pathway                      | 0.029888 |
| mTOR signaling pathway                     | 0.029888 |
| Transcriptional misregulation in cancer    | 0.029888 |
| Chronic myeloid leukemia                   | 0.036218 |
| Pancreatic cancer                          | 0.041512 |
| Pathways in cancer                         | 0.043927 |
| Rheumatoid arthritis                       | 0.047965 |

### **Hsa-miR-590-5p**

| KEGG pathway | p-value |
|--------------|---------|
|--------------|---------|

|                                               |          |
|-----------------------------------------------|----------|
| Colorectal cancer                             | 0.0007   |
| Endocytosis                                   | 0.010513 |
| Pancreatic cancer                             | 0.011203 |
| Chronic myeloid leukemia                      | 0.011203 |
| <b>TGF-beta signaling pathway</b>             | 0.01121  |
| Adherens junction                             | 0.01121  |
| Chagas disease (American trypanosomiasis)     | 0.01121  |
| Osteoclast differentiation                    | 0.012021 |
| Pathways in cancer                            | 0.012021 |
| Transcriptional misregulation in cancer       | 0.029112 |
| MAPK signaling pathway                        | 0.03484  |
| HTLV-I infection                              | 0.03484  |
| <b>Cytokine-cytokine receptor interaction</b> | 0.039368 |

**Supplementary Table 3: Sybergreen qRT-PCR primer sequences.**

Klf 5'-CTGACCAGGCACTACCGTAAA

Klf 3'- CATGTGTAAGGCGAGGTGGT

Nanog 5'- CCAACATCCTGAACCTCAGCTAC

Nanog 3'- GCCTTCTGCGTCACACCATT

Oct 4 5'- TCGAGAACCGAGTGAGAGGC

Oct 4 3'- CCACTCGGACCACATCCTTC

Lin28 5'- CAGCTTCTTCTCCGAACCAA

Lin28 3'-AGCCACCTGCAAAGTCT

Snai2 5'-GCCAAACTACAGCGAACTGG

Snai2 3'- ATCCGGAAAGAGGAGAGAGG

Twist1 5'- AGACCTAGCAGAGCGACGAG

Twist 1 3'- GCAGAGGTGTGAGGATGGTG

N-cadherin 5'- TGCCAGAGTCGTTTACAGCA

N-cadherin 3'- TGTTGTTCCGGCTAATCCTC

Zeb1 5'- CGGCGCAATAACGTTACAA

Zeb1 3'- GGCAGGTCATCCTCTGGTACA

Zeb2 3' - TTCTCATTCGGCCATTTACAG

Vimentin 5' - GACAATGCGTCTCTGGCACGTCTT

Vimentin 3' - TCCTGCAGGTTCTTGGCAGCCA

Rb1 5' - AACTCTCACCTCCCATGTTG

Rb1 3' - TGCACTCCTGTTCTGACCTC

p107 5' - TCGTTCCTTGATGGCTTGTT

p107 3' - AGCGGATCACCACCTCAATA

Rb12 5' - CTGCCTTGAGGTCGTCACTT

Rb12 3' - AGGCCATCTTCTGCTCTAATG

## Supplementary Figures

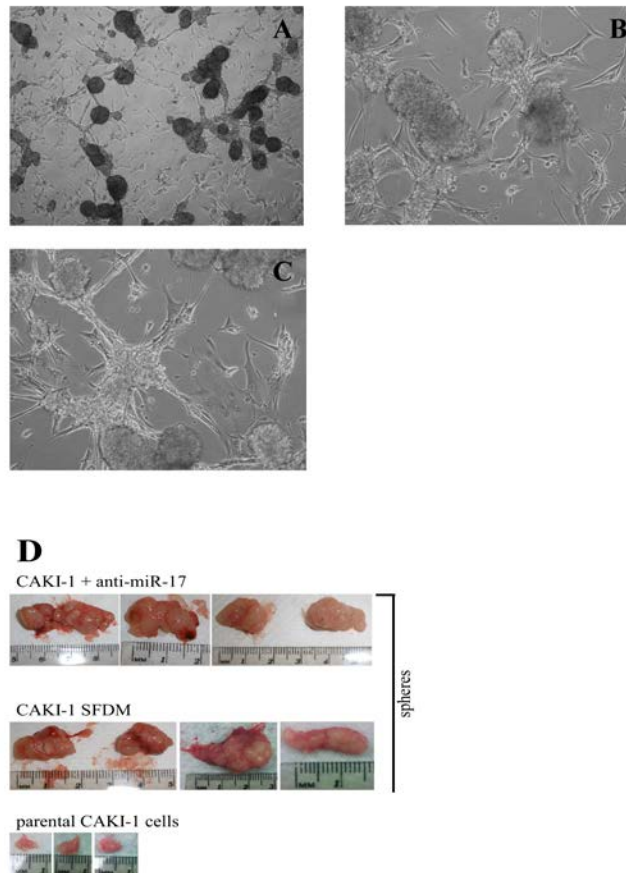

**Supplementary Figure 1: (A-C) Morphological characteristics of RCC spheres.** ACHN spheres were formed in SFDM and were transferred to adherent plate. Spheres quickly attached and formed subcolonies in their proximity. **(D)** Parental CAKI-1 cells or sphere cell resulting from SFDM or anti-miR-17 transfection were subcutaneously injected into NOD/SCID/γ mice and tumors were harvested after six weeks.

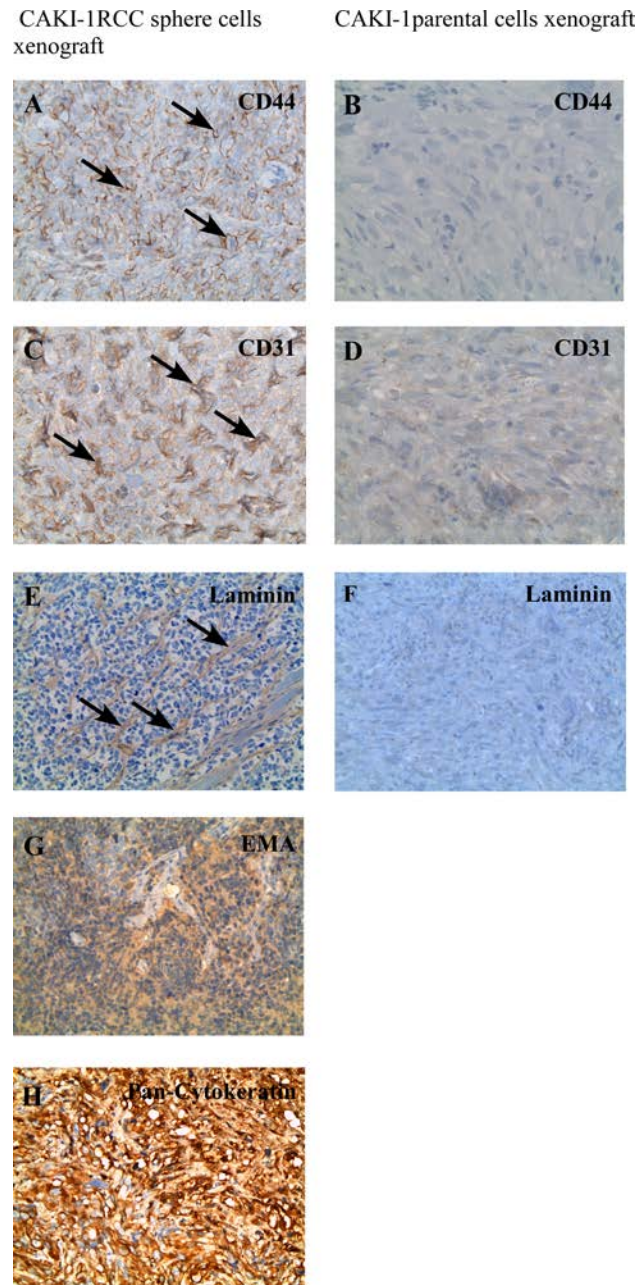

**Supplementary Figure 2: Histological characteristics of the sarcomatoid areas of RCC sphere xenografts.** Sarcomatoid areas of CAKI-1 sphere xenografts stain positive for CD44 (**A**), the vascular endothelial marker CD31 (**C**), and the vasculogenic mimicry marker laminin (**E**), compared to xenografts of the parental CAKI-1 cells (**B**, **D**, **F**) (original magnification X400). The sarcomatoid areas stained positive for EMA (**G**) and Pan-Cytokeratin (**H**).



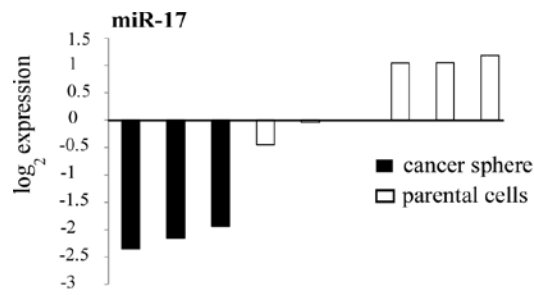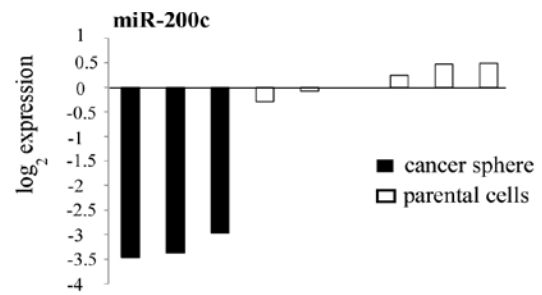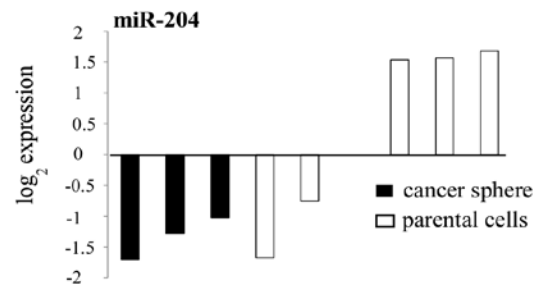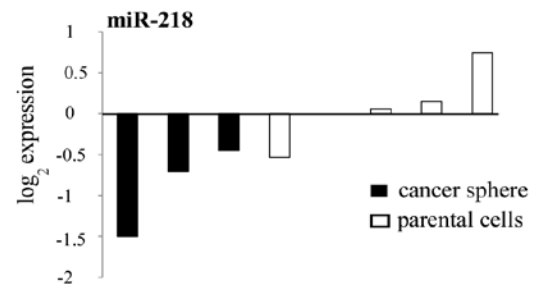

**Supplementary Figure 3: miRNAs are differentially expressed in RCC spheres.** Decreased expression of miR-17, miR-200c, miR-204 and miR-218 in CAKI-1 spheres was validated by comparing different sphere preparations to different stocks of CAKI-1 parental cells.

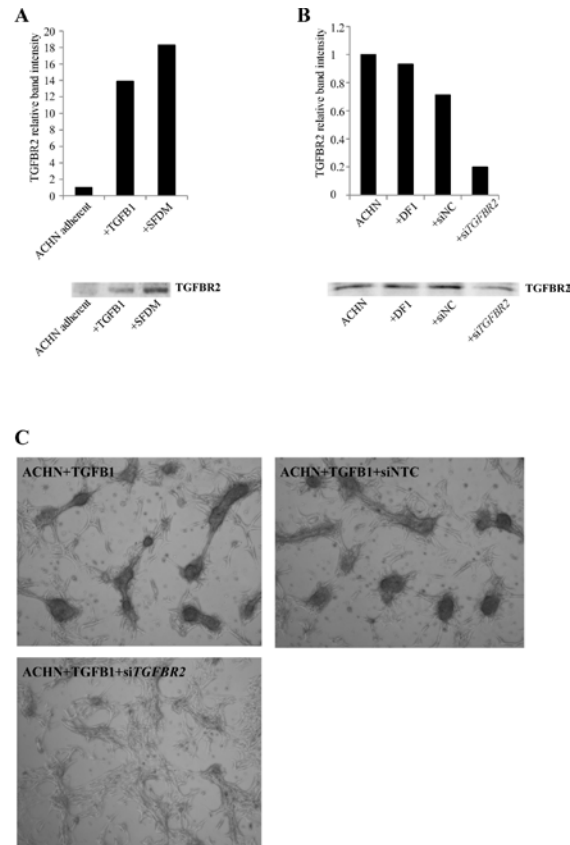

**Supplementary Figure 4: *TGFBR2* expression is increased under RCC sphere supporting conditions. (A)**

Western blot analysis indicated increased expression of *TGFBR2* upon  $TGF\beta 1$  treatment or in SFDM media. **(B)** ACHN cells were transfected with a pool of four siRNAs designed against *TGFBR2*. Western blot analysis indicates reduced *TGFBR* level in the si*TGFBR2* transfected ACHN cells compared to cells treated with transfection agent Dharmafect (DF1) or transfected with a negative control pool of siRNAs (siNC). **(C)**  $TGF\beta$  treatment of ACHN cells leads to rapid formation of colony-like structures **(left panel)**. These colonies can be propagated in 3D culture as spheres. ACHN colony formation is prevented by si*TGFBR2* transfection **(lower panel)** but not by transfection of the non-targeting pool of negative control siRNAs (siNC) **(right panel)**.
